# Supplementary material for: Gene correlation network analysis to identify regulatory factors in idiopathic pulmonary fibrosis
Source: PubMed Central journal article supplement — Thorax. 2018 Oct 26;74(2):132–40. doi: 10.1136/thoraxjnl-2018-211929 (PMC6467239; doi:10.1136/thoraxjnl-2018-211929), 2018-10-26
Supplement: thoraxjnl-2018-211929supp001.pdf [file thoraxjnl-2018-211929supp001.pdf]

## Supplemental Figures

**Figure S1:** Hierarchical clustering of the gene data for (top) IPF and (bottom) control datasets are shown. Red lines on dendrograms refer to the threshold that was set for identifying outliers. We identified 1 outlier in each IPF group and 3 and 1 outliers in the two control groups.

**Figure S2:** Module Eigengene clustering for the two IPF groups. Comparison of Module Eigengenes between the two groups shows good preservation.

**Figure S3:** A t-SNE plot is shown using the 6425 differentially expressed genes we identified for IPF on 3 IPF datasets. (A) GSE53845 consists of 40 IPF samples and 8 control samples. (B) GSE110147 consists of 22 IPF, 10 NSIP and 11 control samples. (C) The complete LTRC dataset comprised of IPF (n=160), COPD (n=220), respiratory bronchiolitis interstitial lung disease (RB-ILD) (n=13), non-specific interstitial pneumonia (NSIP) (n=17), hypersensitivity pneumonitis (HP) (n=30), and control (n=108) subjects. Subjects with IPF were distinctly separated from control samples using these genes in all datasets. There appears to be some overlap between NSIP and HP with IPF but a distinct separation for other disease phenotypes. Ellipses denote a 67% confidence interval for each phenotype.

**Figure S4-S7:** Correlations between all modules and phenotypic traits are shown for the two control groups (S4 and S5) and two IPF groups (S6 and S7). Numbers are the R-values determined by Spearman's correlation between the module eigenvector and the trait data. Number in parenthesis is the FDR adjusted *P*-value calculated for the correlation.

**Figure S8:** Module associated with specific cell types by GO pathway analysis was localized to specific cells using a single cell dataset. Markers for specific cell types consist of VWF (endothelial cells), EPCAM (epithelial cells), and FOXJ1 (ciliated epithelial cells). The marker used to identify fibroblasts is collagen 1 which was also the marker used for module ME6. We localized the most highly connected genes for these modules to specific cluster of cells to confirm the validity of the GO pathway analysis. Colour scale ranges from low (purple) to high (yellow) expression.

**Figure S9:** The transcription factor ZBTB7B was found to be a novel regulator for epithelial cells as it was the regulator of module ME1 with the strongest enrichment score. (A) We examined the human protein atlas and found ZBTB7B mRNA to be highly expressed in all epithelial cell types (red). (B) Human Protein Atlas showed the ZBTB7B protein expression was also present in lung bronchial epithelial cells. Scale bar = 50  $\mu$ m (C) A single cell dataset we had previously generated showed ZBTB7B (right) as being highly expressed in lung epithelial cells (EPCAM positive stained cells, left).

**Figure S10:** The median value for every gene included in each module was calculated and shown as a boxplot using the peripheral blood sample dataset. While immune response modules showed the highest median gene expression, all modules were detectable in the blood.

**Table S1:** Transcription factor regulators associated with each module are listed with the number of genes within each module they regulate. Merged number of regulated genes column shows the total number of overlapping genes these transcription factors regulate within the module. Asterisk denotes transcription factors which are also present within the module gene list.

**Table S2:** A list of miRNAs correlated with each module and the target genes they regulate based on the validated miRNA-target database (miRTarBase). Negative correlation identifies miRNA with a negative correlation to the module Eigengene. MM columns show the module membership of each gene for its respective module in both IPF group 1 and group 2.

**Table S3:** A listing of all GEO datasets using IPF tissue samples with transcriptomics data, including the dataset used in this study. The number of IPF and Control subjects included in each dataset are shown with the platform used for analysis and the date the data was submitted.

Figure S1

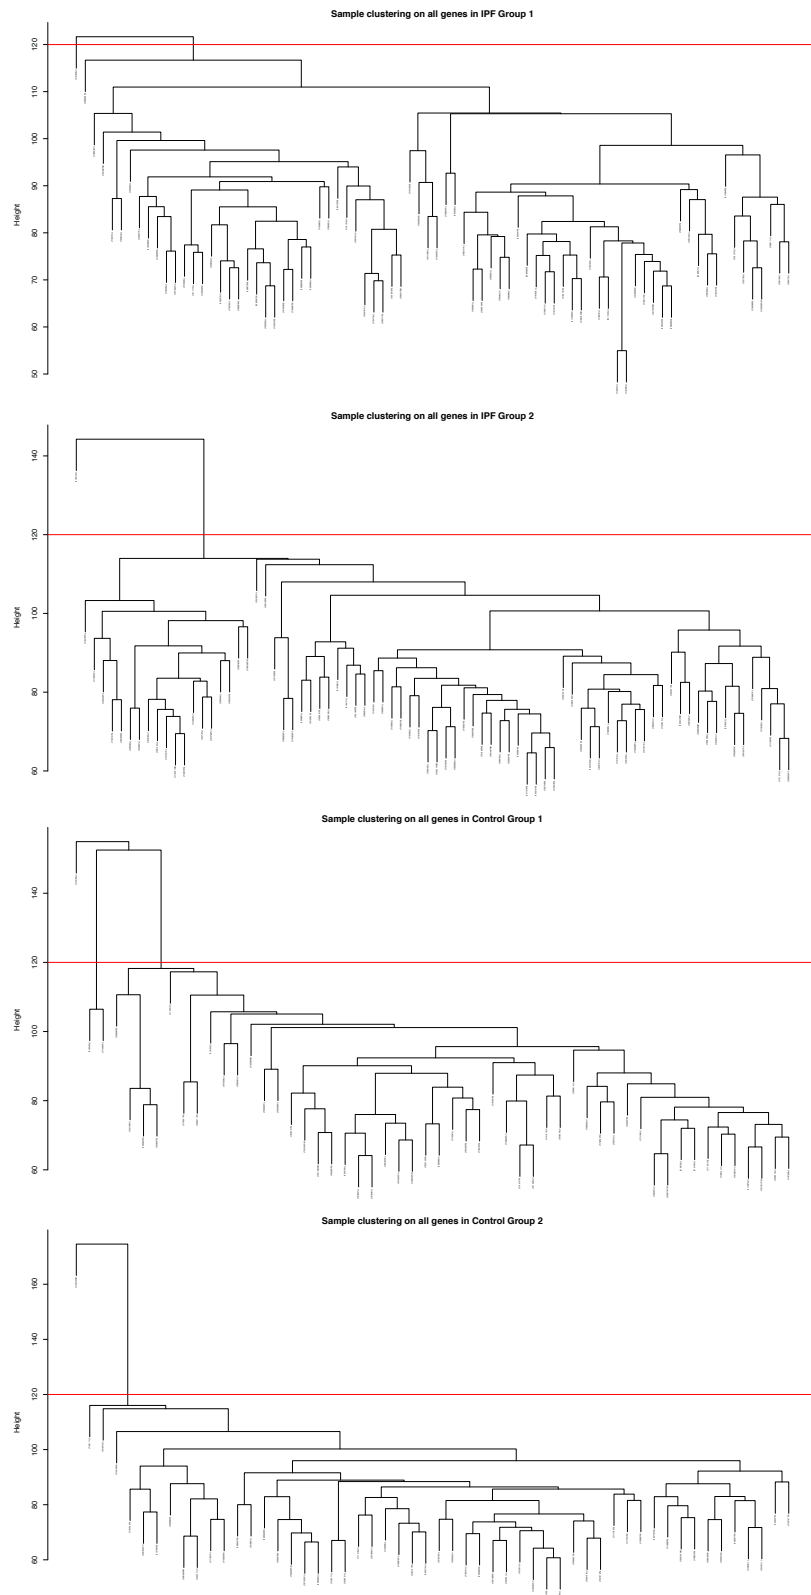

Figure S2

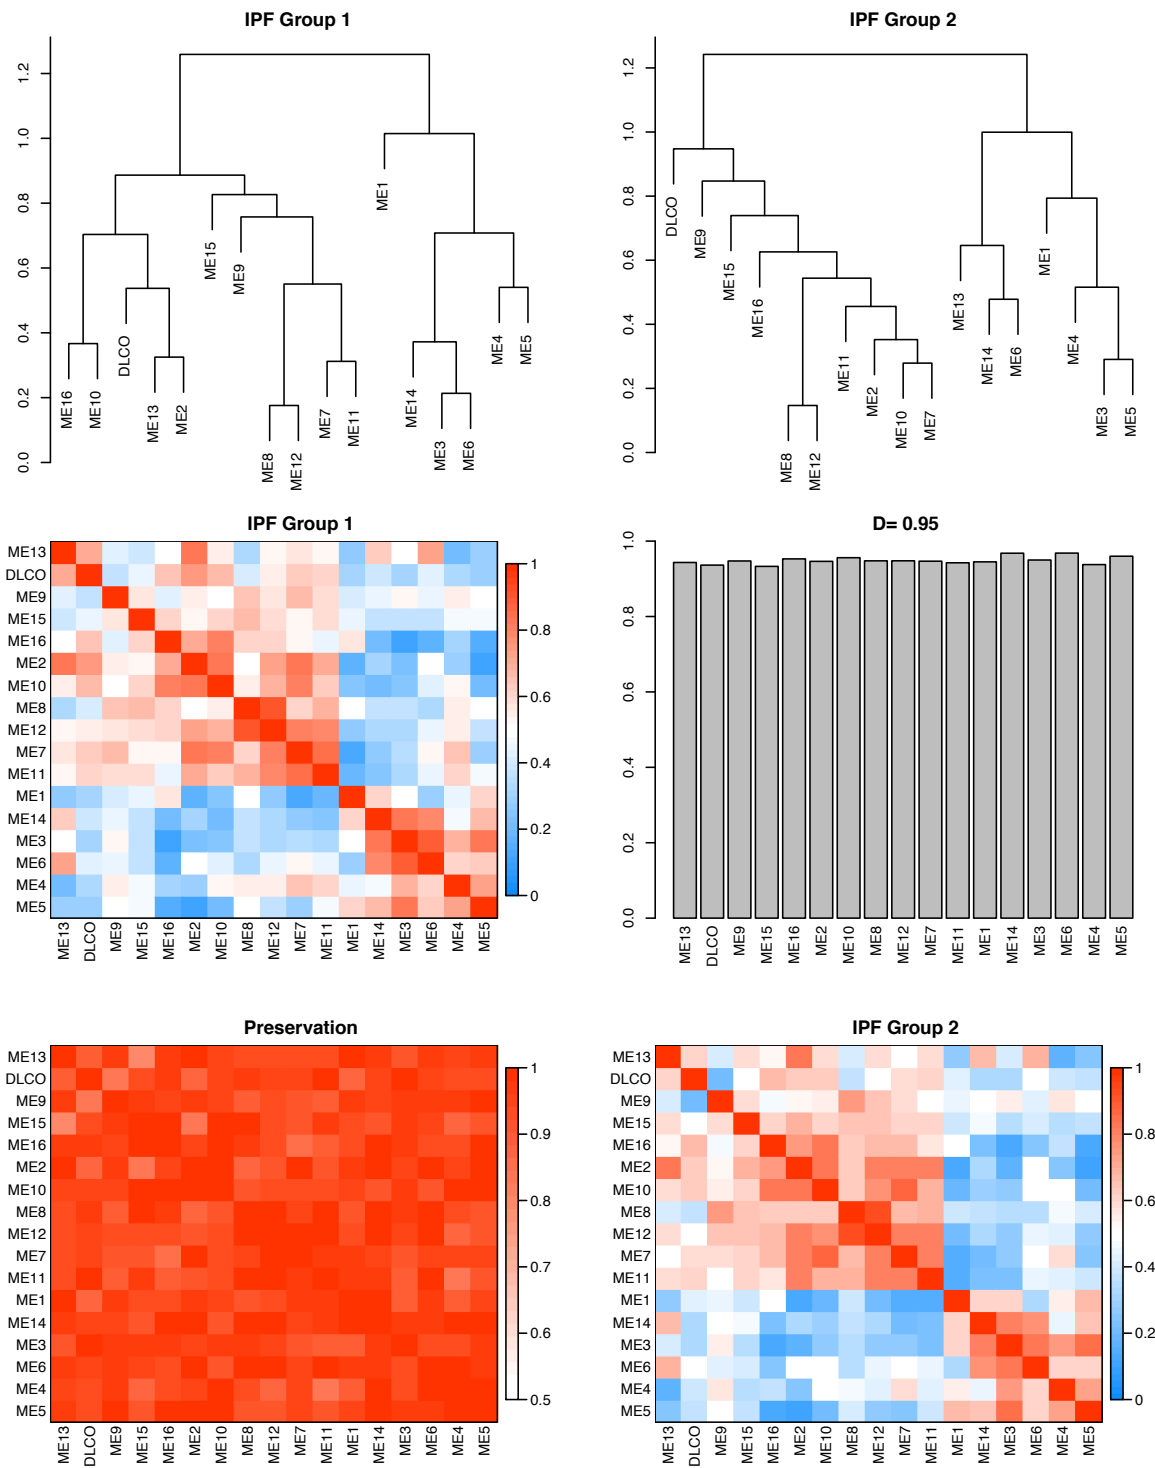

Figure S3

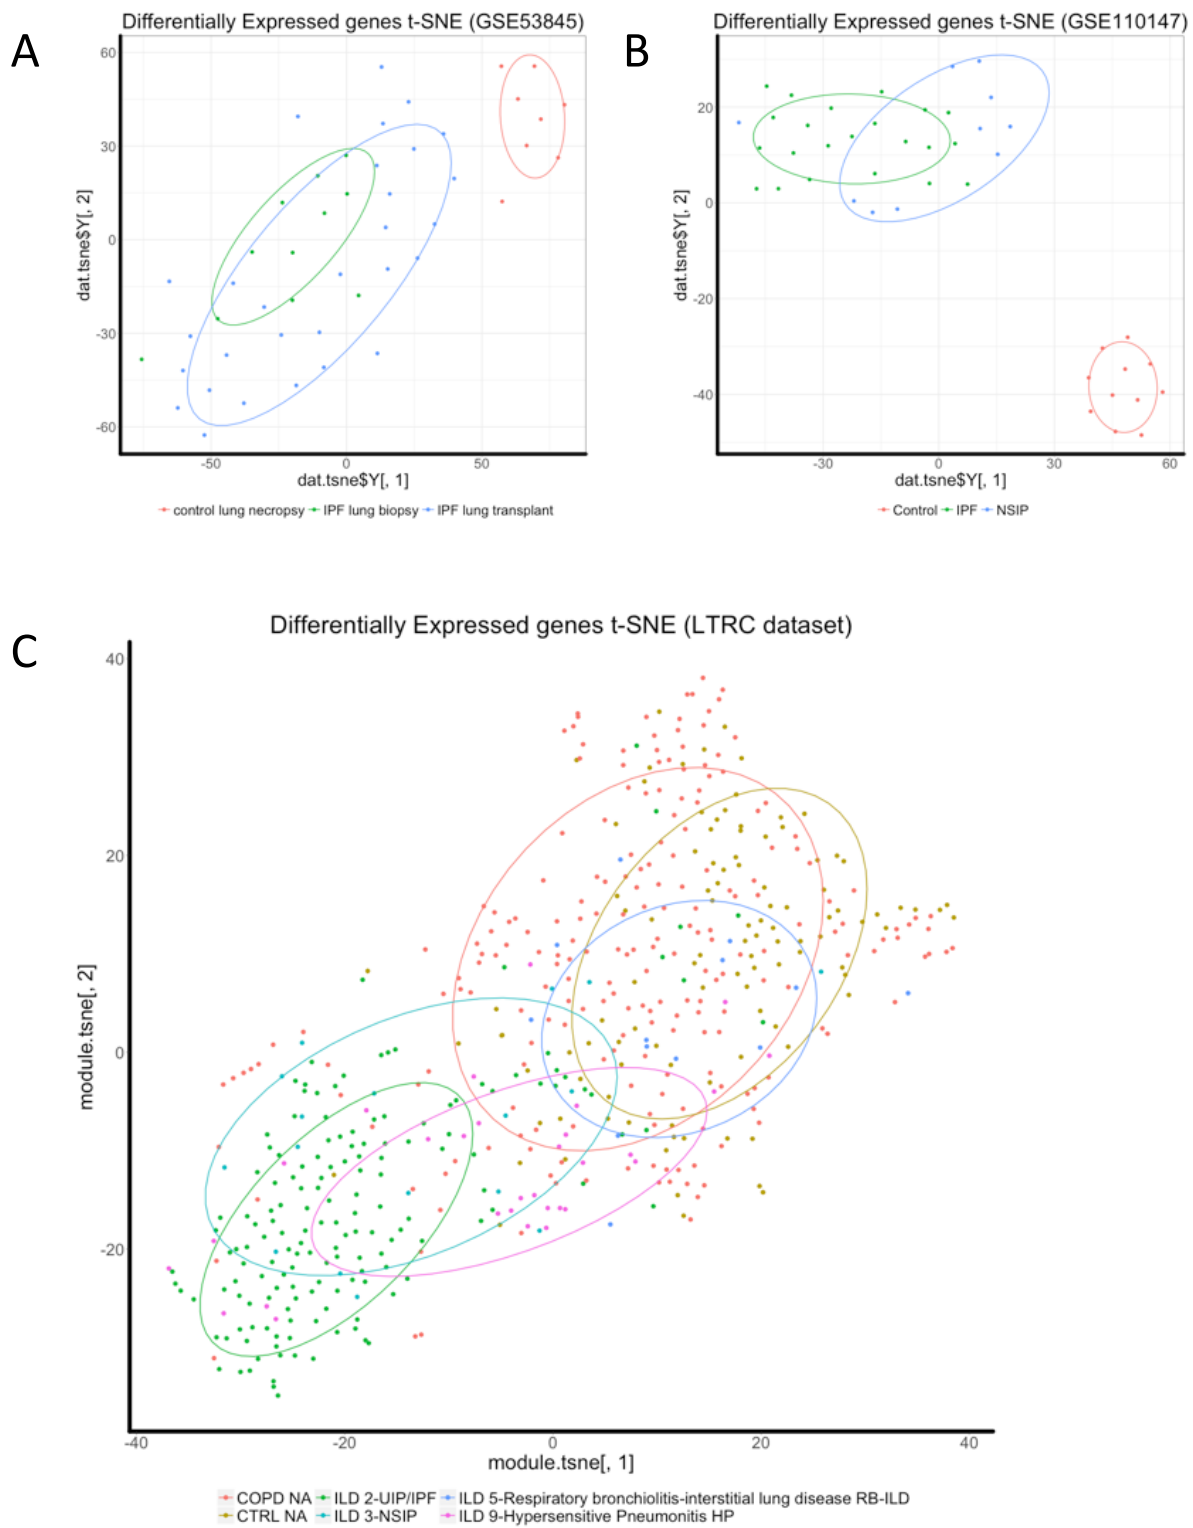

Figure S4

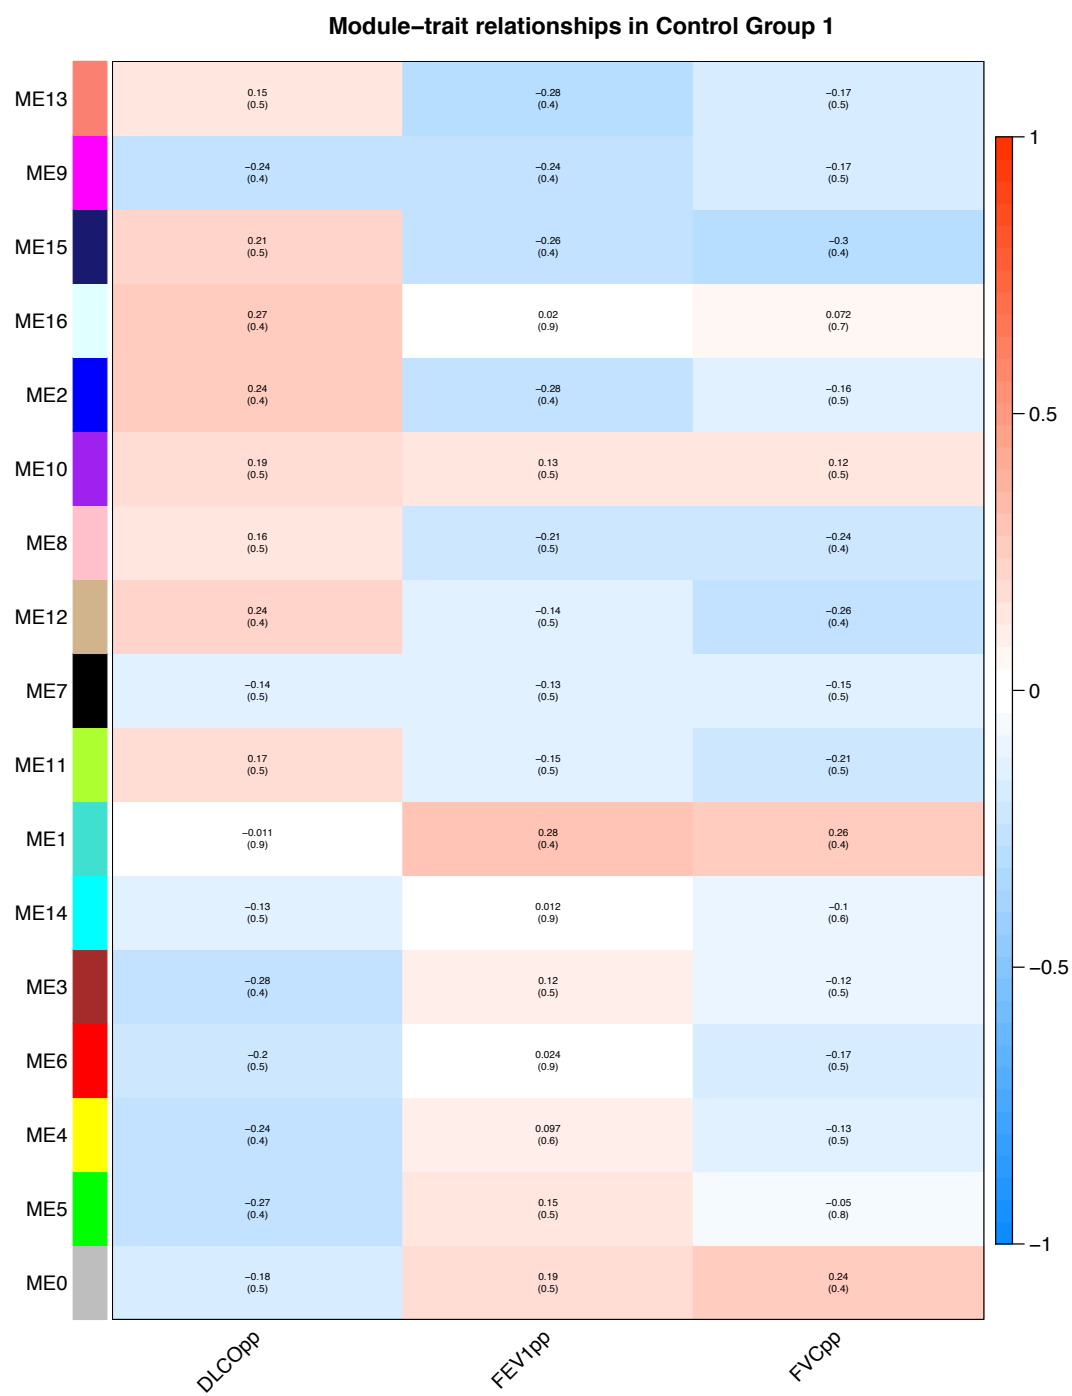

Figure S5

Module-trait relationships in Control Group 2

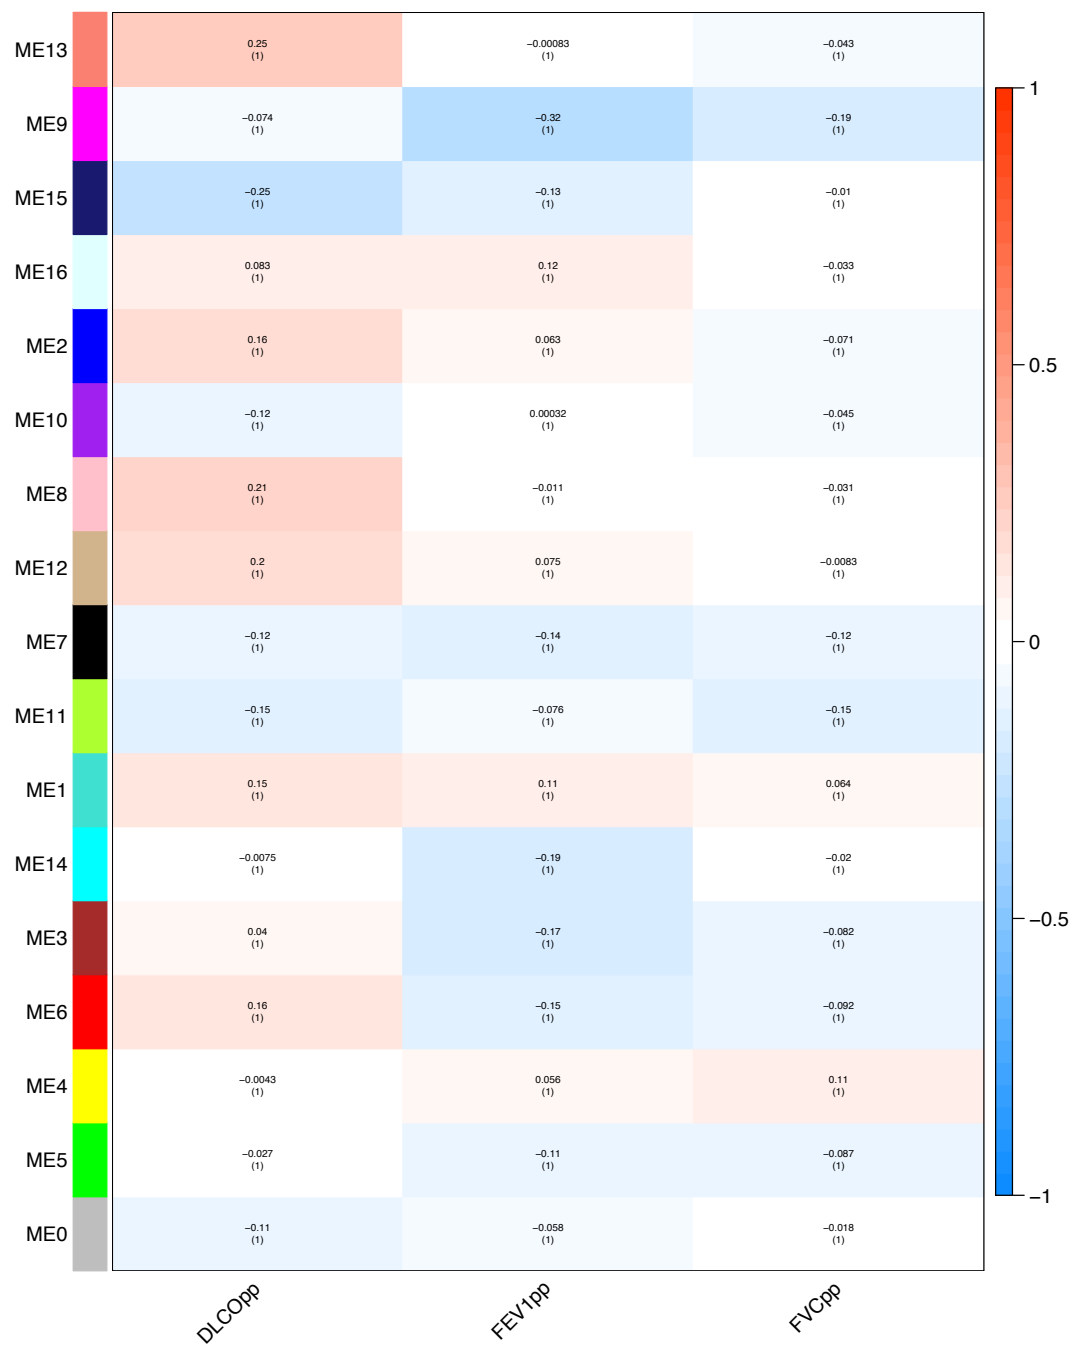

Figure S6

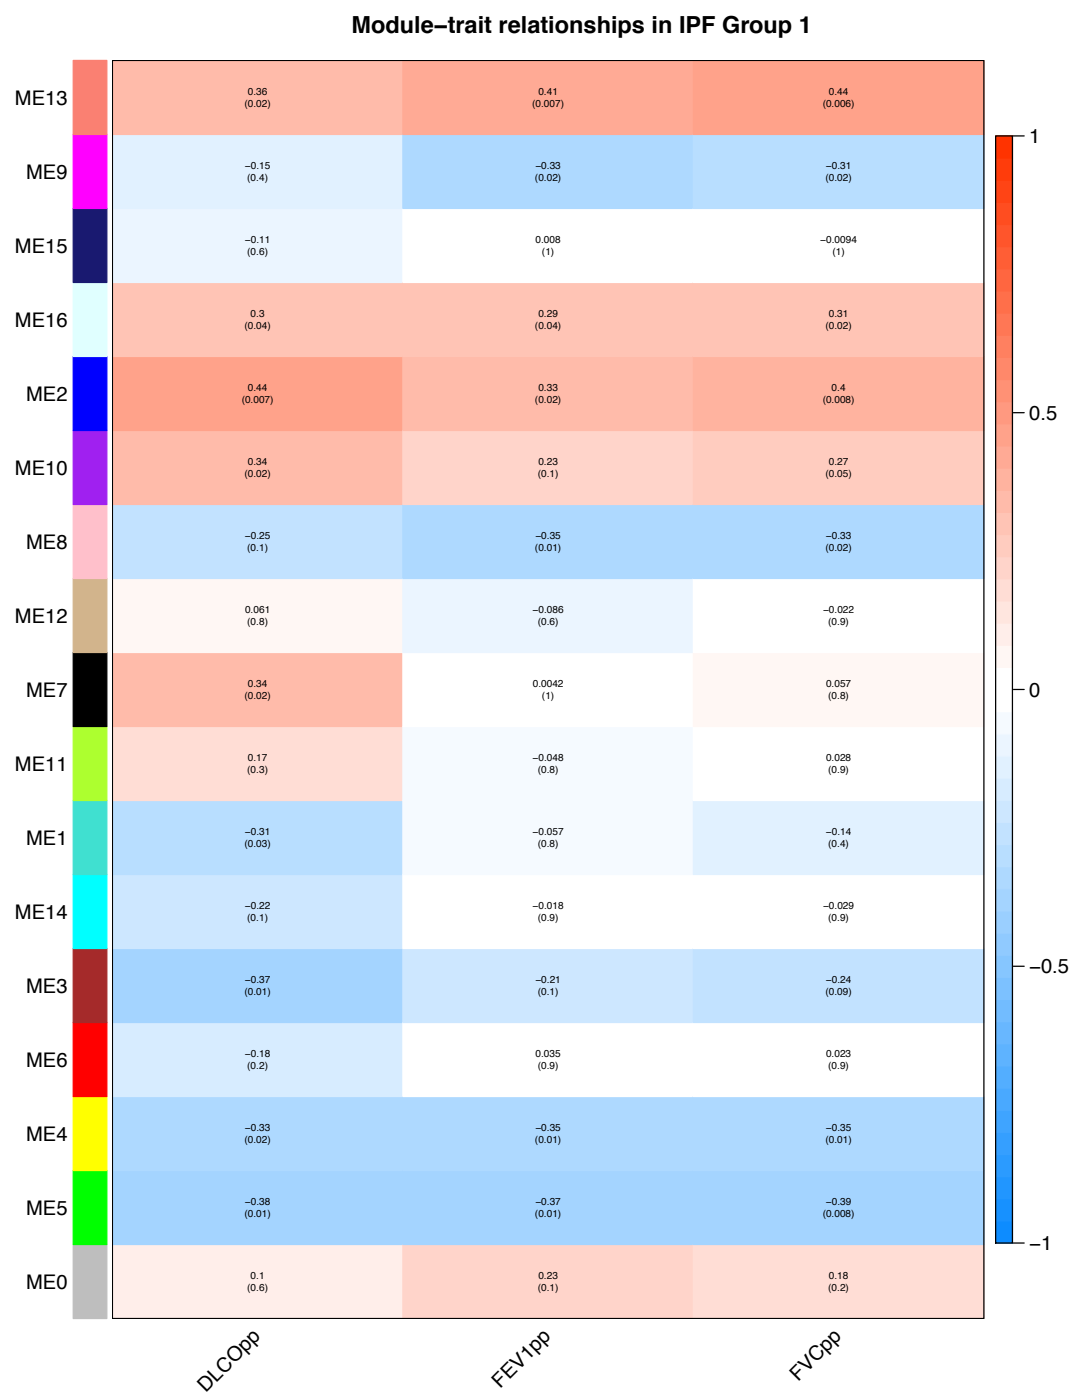



Figure S7

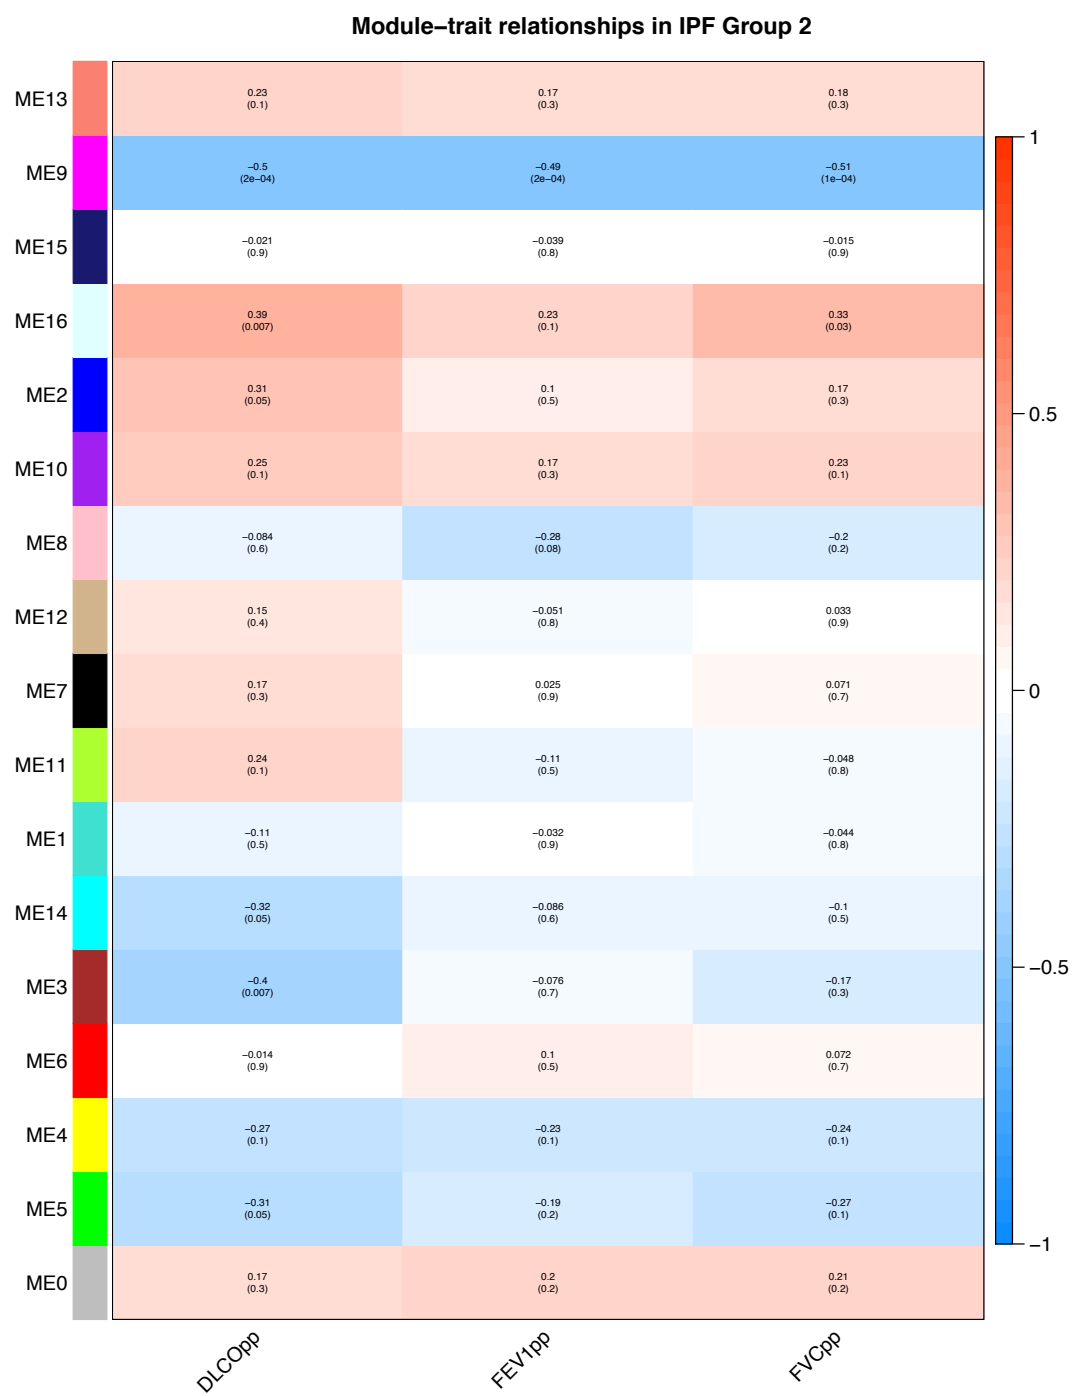

Figure S8

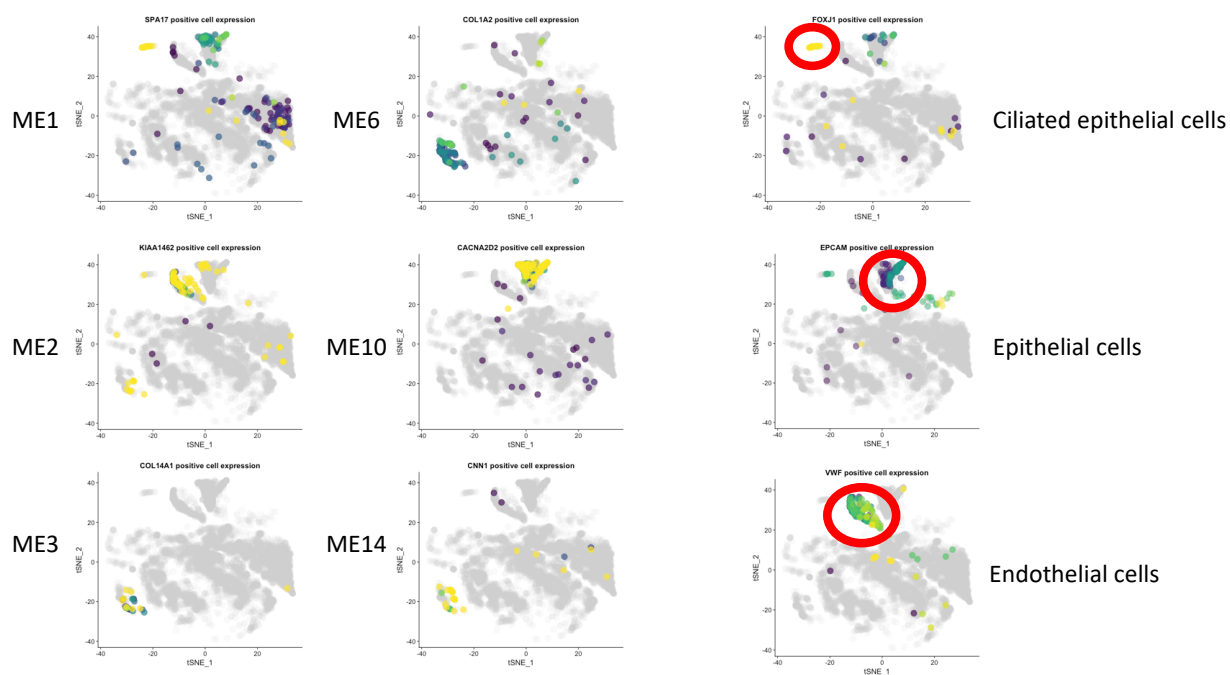

Figure S9

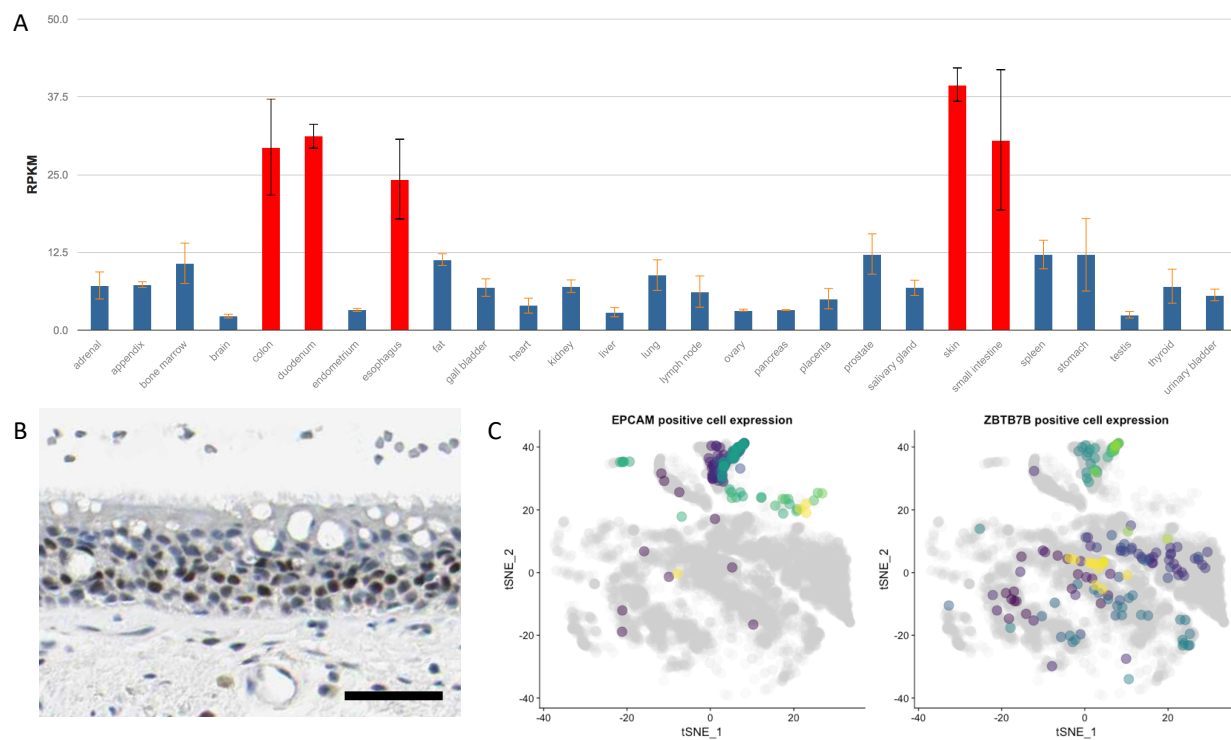

Figure S10

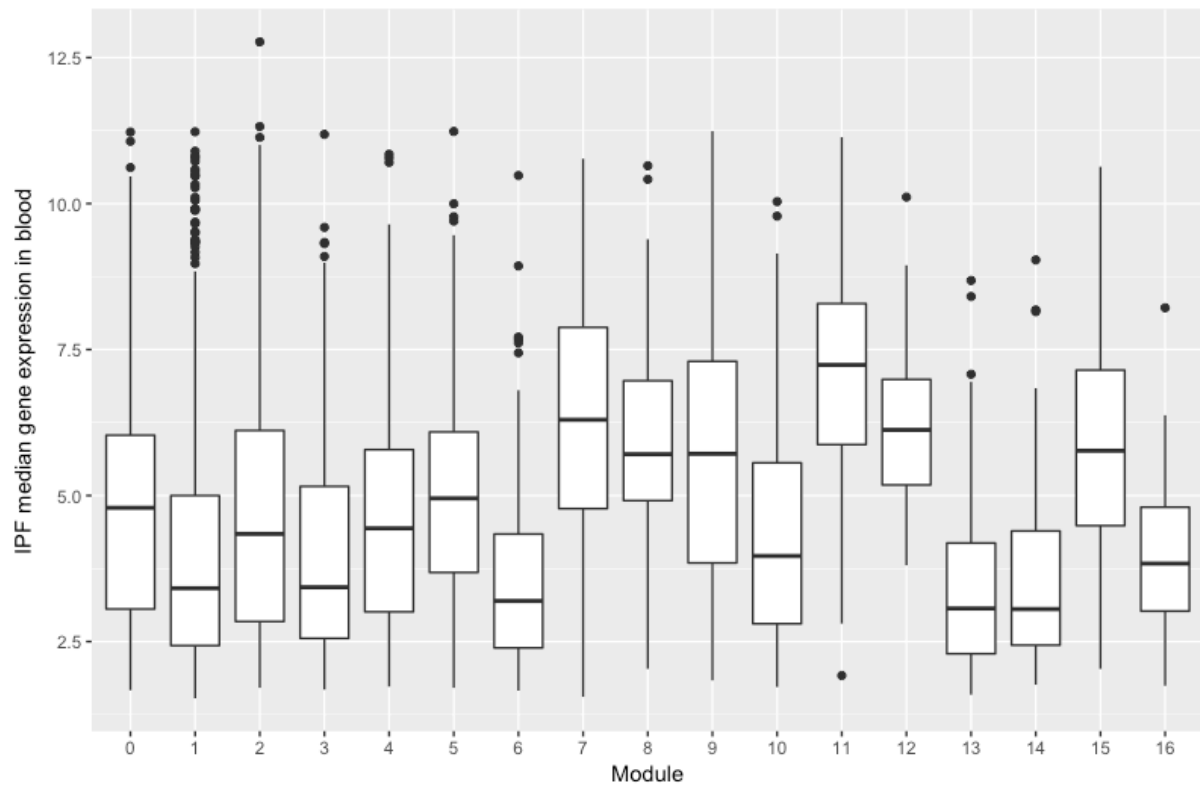

Table S1

| Module | Number Genes in Module | Merged Number Regulated Genes | Transcription Factor | Regulated Genes in Module |
|--------|------------------------|-------------------------------|----------------------|---------------------------|
| ME1    | 1579                   | 541                           | RFX2                 | 506                       |
|        |                        |                               | ZBTB7B               | 376                       |
| ME4    | 380                    | 258                           | E2F4                 | 190                       |
|        |                        |                               | SIN3A                | 161                       |
|        |                        |                               | TFDP1                | 123                       |
|        |                        |                               | MYBL2*               | 97                        |
|        |                        |                               | FOXM1*               | 93                        |
|        |                        |                               | E2F7                 | 30                        |
| ME6    | 207                    | 89                            | EP300                | 74                        |
|        |                        |                               | TCF12                | 65                        |
| ME7    | 204                    | 133                           | SPI1                 | 123                       |
|        |                        |                               | EBF1                 | 23                        |
|        |                        |                               | JUN                  | 23                        |
| ME8    | 188                    | 98                            | CREB1                | 98                        |
| ME9    | 163                    | 82                            | NR3C1                | 57                        |
|        |                        |                               | CHD1                 | 54                        |
| ME10   | 158                    | 30                            | SREBF1               | 18                        |
|        |                        |                               | ZEB1                 | 13                        |
| ME11   | 116                    | 85                            | EBF1                 | 65                        |
|        |                        |                               | STAT1                | 39                        |
|        |                        |                               | IRF1*                | 30                        |
|        |                        |                               | STAT2*               | 21                        |
|        |                        |                               | RFX5                 | 19                        |
| ME13   | 80                     | 26                            | EB300                | 23                        |
|        |                        |                               | TCF12                | 18                        |
| ME14   | 75                     | 58                            | SRF                  | 38                        |
|        |                        |                               | TCF12*               | 36                        |
| ME15   | 58                     | 15                            | ATF3                 | 15                        |
| ME16   | 39                     | 24                            | ZEB1                 | 10                        |
|        |                        |                               | EP300                | 22                        |
|        |                        |                               | TEAD4                | 8                         |

Table S2

| Module | miRNA           | Target gene | Negative correlation | MM IPF group 1 | MM IPF group 2 |
|--------|-----------------|-------------|----------------------|----------------|----------------|
| ME1    | hsa-miR-200a-3p | MACC1       |                      | 0.314          | 0.421          |
| ME1    | hsa-miR-200a-3p | RPL12       |                      | 0.526          | 0.368          |
| ME1    | hsa-miR-200a-5p | METTL7A     |                      | 0.468          | 0.317          |
| ME1    | hsa-miR-200b-3p | AVPR1A      |                      | 0.362          | 0.278          |
| ME1    | hsa-miR-200b-3p | UNC119B     |                      | 0.863          | 0.826          |
| ME1    | hsa-miR-200b-5p | C11orf74    |                      | 0.891          | 0.897          |
| ME1    | hsa-miR-205-5p  | TRAF3IP1    |                      | 0.929          | 0.927          |
| ME1    | hsa-miR-31-5p   | FOXC1       |                      | 0.721          | 0.739          |
| ME1    | hsa-miR-34b-3p  | MET         |                      | 0.727          | 0.800          |
| ME1    | hsa-miR-34b-5p  | MET         |                      | 0.727          | 0.800          |
| ME1    | hsa-miR-34b-5p  | RPS19       |                      | 0.255          | 0.539          |
| ME1    | hsa-miR-34c-3p  | GALK2       |                      | 0.686          | 0.664          |
| ME1    | hsa-miR-34c-5p  | RUNX2       |                      | 0.558          | 0.590          |
| ME2    | hsa-miR-126-3p  | KRAS        |                      | 0.313          | 0.406          |
| ME2    | hsa-miR-126-3p  | VEGFA       |                      | 0.674          | 0.785          |
| ME2    | hsa-miR-126-5p  | VEGFA       |                      | 0.674          | 0.785          |
| ME2    | hsa-miR-132-3p  | BDNF        | *                    | 0.761          | 0.817          |
| ME2    | hsa-miR-132-3p  | PARP10      | *                    | 0.290          | 0.310          |
| ME2    | hsa-miR-132-3p  | TSPAN12     | *                    | 0.839          | 0.728          |
| ME2    | hsa-miR-205-3p  | HS2ST1      | *                    | 0.254          | 0.384          |
| ME2    | hsa-miR-205-5p  | TAF11       | *                    | 0.268          | 0.630          |
| ME2    | hsa-miR-30a-3p  | FOXP1       |                      | 0.322          | 0.467          |
| ME2    | hsa-miR-30a-3p  | PLA2G16     |                      | 0.582          | 0.535          |
| ME2    | hsa-miR-30a-3p  | SULT1C4     |                      | 0.628          | 0.372          |
| ME2    | hsa-miR-30a-3p  | TMEM2       |                      | 0.496          | 0.513          |
| ME2    | hsa-miR-30a-5p  | MOGAT1      |                      | 0.696          | 0.599          |
| ME2    | hsa-miR-30a-5p  | RAB14       |                      | 0.647          | 0.428          |
| ME2    | hsa-miR-30a-5p  | TBC1D4      |                      | 0.528          | 0.597          |
| ME2    | hsa-miR-30a-5p  | ZNRF1       |                      | 0.636          | 0.566          |
| ME2    | hsa-miR-30b-3p  | C19orf47    |                      | 0.271          | 0.396          |
| ME2    | hsa-miR-30b-3p  | FAM105A     |                      | 0.852          | 0.872          |
| ME2    | hsa-miR-30b-3p  | NCOR2       |                      | 0.486          | 0.475          |
| ME2    | hsa-miR-30b-3p  | PLCD3       |                      | 0.402          | 0.286          |
| ME2    | hsa-miR-30b-3p  | PPFIBP1     |                      | 0.534          | 0.581          |
| ME2    | hsa-miR-30b-3p  | RBMS2       |                      | 0.399          | 0.480          |
| ME2    | hsa-miR-30d-5p  | DCTN4       |                      | 0.344          | 0.308          |
| ME2    | hsa-miR-30d-5p  | IER5        |                      | 0.616          | 0.456          |
| ME2    | hsa-miR-30d-5p  | LDLR        |                      | 0.485          | 0.497          |
| ME2    | hsa-miR-30d-5p  | ZMPSTE24    |                      | 0.185          | 0.181          |
| ME2    | hsa-miR-31-5p   | KLF13       | *                    | 0.584          | 0.657          |

|      |                 |           |   |       |       |
|------|-----------------|-----------|---|-------|-------|
| ME2  | hsa-miR-31-5p   | MED12     | * | 0.211 | 0.230 |
| ME2  | hsa-miR-31-5p   | PRKCE     | * | 0.806 | 0.846 |
| ME2  | hsa-miR-31-5p   | RDX       | * | 0.759 | 0.742 |
| ME2  | hsa-miR-31-5p   | ZC3H12C   | * | 0.454 | 0.593 |
| ME2  | hsa-miR-338-3p  | RNF8      |   | 0.320 | 0.332 |
| ME3  | hsa-miR-127-3p  | RGMA      |   | 0.590 | 0.647 |
| ME3  | hsa-miR-203a-3p | EGLN1     | * | 0.595 | 0.539 |
| ME3  | hsa-miR-203a-5p | CALU      | * | 0.769 | 0.728 |
| ME3  | hsa-miR-203b-3p | SEC24D    | * | 0.828 | 0.780 |
| ME3  | hsa-miR-203b-3p | TIMM8A    | * | 0.470 | 0.658 |
| ME3  | hsa-miR-30a-3p  | FXN       | * | 0.467 | 0.563 |
| ME3  | hsa-miR-30a-3p  | SLITRK4   | * | 0.558 | 0.385 |
| ME3  | hsa-miR-30a-5p  | CDC123    | * | 0.279 | 0.315 |
| ME3  | hsa-miR-30a-5p  | LOX       | * | 0.786 | 0.503 |
| ME3  | hsa-miR-30a-5p  | PLA2G4A   | * | 0.397 | 0.343 |
| ME3  | hsa-miR-30a-5p  | PPP1CC    | * | 0.263 | 0.235 |
| ME3  | hsa-miR-30a-5p  | SH3GL1    | * | 0.729 | 0.748 |
| ME3  | hsa-miR-30a-5p  | XPOT      | * | 0.339 | 0.308 |
| ME3  | hsa-miR-30b-5p  | ATG12     | * | 0.284 | 0.416 |
| ME3  | hsa-miR-30b-5p  | ELOVL4    | * | 0.647 | 0.476 |
| ME3  | hsa-miR-30b-5p  | TMEM106B  | * | 0.610 | 0.497 |
| ME5  | hsa-miR-30a-5p  | NOL8      | * | 0.320 | 0.405 |
| ME5  | hsa-miR-30a-5p  | NXT1      | * | 0.398 | 0.511 |
| ME5  | hsa-miR-30a-5p  | PAICS     | * | 0.531 | 0.520 |
| ME5  | hsa-miR-30a-5p  | PLIN3     | * | 0.518 | 0.481 |
| ME5  | hsa-miR-30a-5p  | SLC38A1   | * | 0.462 | 0.561 |
| ME5  | hsa-miR-30a-5p  | SPCS3     | * | 0.901 | 0.890 |
| ME5  | hsa-miR-30a-5p  | TNFRSF10B | * | 0.515 | 0.557 |
| ME5  | hsa-miR-30a-5p  | TXNDC5    | * | 0.844 | 0.819 |
| ME5  | hsa-miR-30b-3p  | COX6B1    | * | 0.514 | 0.551 |
| ME5  | hsa-miR-30b-3p  | CSTF1     | * | 0.253 | 0.304 |
| ME5  | hsa-miR-30b-3p  | DPM2      | * | 0.492 | 0.499 |
| ME5  | hsa-miR-30b-3p  | SNRPD1    | * | 0.375 | 0.612 |
| ME5  | hsa-miR-30b-3p  | TIAL1     | * | 0.558 | 0.227 |
| ME5  | hsa-miR-30b-3p  | TNFRSF13C | * | 0.847 | 0.787 |
| ME5  | hsa-miR-30b-5p  | CASP3     | * | 0.779 | 0.606 |
| ME5  | hsa-miR-30b-5p  | CHST15    | * | 0.735 | 0.717 |
| ME5  | hsa-miR-30b-5p  | LARP1     | * | 0.463 | 0.587 |
| ME5  | hsa-miR-30b-5p  | SMAD1     | * | 0.405 | 0.466 |
| ME10 | hsa-miR-338-3p  | GPRC5A    |   | 0.686 | 0.707 |
| ME10 | hsa-miR-652-3p  | QSOX1     |   | 0.756 | 0.702 |
| ME14 | hsa-miR-133b    | PTBP2     |   | 0.473 | 0.564 |

Table S3

| <b>GEO Dataset</b> | <b># Subjects</b>                                         | <b>Platform</b> | <b>Submission Date</b>                                                                |           |
|--------------------|-----------------------------------------------------------|-----------------|---------------------------------------------------------------------------------------|-----------|
| GSE10667           | 23 IPF/8 IPF+acute exacerbations;<br>15 Control           | GPL4133         | Agilent-014850 Whole Human Genome Microarray<br>4x44K G4112F (Feature Number version) | 28-Feb-08 |
| GSE21369           | 11 IPF/5 NSIP/7 uncharacterized ILD;<br>6 Control         | GPL570          | [HG-U133_Plus_2] Affymetrix Human Genome U133<br>Plus 2.0 Array                       | 16-Apr-10 |
| GSE24206           | 11 IPF; 6 Control                                         | GPL570          | [HG-U133_Plus_2] Affymetrix Human Genome U133<br>Plus 2.0 Array                       | 17-Sep-10 |
| GSE31934           | 3 IPF; 3 Control                                          | GPL11097        | [Glyco_v4_Hs] Custom Affymetrix Glyco v4 GeneChip                                     | 06-Sep-11 |
| GSE32537           | 119 IPF/17 NSIP/31 other ILD;<br>50 Control (LTRC)        | GPL6244         | [HuGene-1_0-st] Affymetrix Human Gene 1.0 ST Array<br>[transcript (gene) version]     | 01-Oct-11 |
| GSE35145           | 4 IPF; 4 Control                                          | GPL10558        | Illumina HumanHT-12 V4.0 expression beadchip                                          | 17-Jan-12 |
| GSE47460           | 160 IPF/30 HP/17 NSIP/47 other ILD;<br>108 Control (LTRC) | GPL6480         | Agilent-014850 Whole Human Genome Microarray<br>4x44K G4112F (Probe Name version)     | 29-May-13 |
| GSE48149           | 13 IPF; 9 Control                                         | GPL16221        | Illumina HumanRef-8 v3.0 expression beadchip<br>(Search Key version)                  | 20-Jun-13 |
| GSE52463           | 8 IPF; 7 Control                                          | GPL11154        | Illumina HiSeq 2000 (Homo sapiens)                                                    | 18-Nov-13 |
| GSE53845           | 40 IPF; 8 Control                                         | GPL6480         | Agilent-014850 Whole Human Genome Microarray<br>4x44K G4112F (Probe Name version)     | 06-Jan-14 |
| GSE72073           | 5 IPF; 3 Control                                          | GPL17586        | [HTA-2_0] Affymetrix Human Transcriptome Array 2.0<br>[transcript (gene) version]     | 14-Aug-15 |
| GSE83717           | 7 IPF; 5 Control                                          | GPL11154        | Illumina HiSeq 2000 (Homo sapiens)                                                    | 24-Jun-16 |
| GSE92592           | 20 IPF; 19 Control (LTRC)                                 | GPL11154        | Illumina HiSeq 2000 (Homo sapiens)                                                    | 19-Dec-16 |
| GSE99621           | 3 IPF; 3 Control                                          | GPL16791        | Illumina HiSeq 2500 (Homo sapiens)                                                    | 02-Jun-17 |
| GSE110147          | 22 IPF/10 NSIP/5 mixed IPF-NSIP;<br>11 Control            | GPL6244         | [HuGene-1_0-st] Affymetrix Human Gene 1.0 ST Array<br>[transcript (gene) version]     | 05-Feb-18 |
